# Supplementary material for: EXP1 is critical for nutrient uptake across the parasitophorous vacuole membrane of malaria parasites
Source: PLoS Biol. 2019 Sep 30;17(9):e3000473. doi: 10.1371/journal.pbio.3000473 (PMC6786648; doi:10.1371/journal.pbio.3000473)
Supplement: S1 Data — (XLSX) [file pbio.3000473.s010.xlsx]

## Sheet: Fig 1D
	Control 24 hours	Rapalog 24 hours	Control 48 hours	Rapalog 48 hours
	1	0.704876	1	0.032206
	1	0.752761	1	0.061582
	Number of values	2	2	2	2
	Minimum	1	0.7049	1	0.03221
	25% Percentile	1	0.7049	1	0.03221
	Median	1	0.7288	1	0.04689
	75% Percentile	1	0.7528	1	0.06158
	Maximum	1	0.7528	1	0.06158
	Mean	1	0.7288	1	0.04689
	Std. Deviation	0	0.03386	0	0.02077
	Std. Error of Mean	0	0.02394	0	0.01469
	Lower 95% CI of mean	1	0.4246	1	-0.1397
	Upper 95% CI of mean	1	1.033	1	0.2335
	Sum	2	1.458	2	0.09379

## Sheet: Fig 1E
Day	Parasitemia Control	Parasitemia +Rapalog
1	0.1	0.1
2	0.31	0.15
3	1.65	0.1
4	2.41	0.13
5	9.85	0.17

## Sheet: Fig 1F
		Control-Rapalog	+ Rapalog	Control-Rapalog	+ Rapalog	Control-Rapalog	+ Rapalog	Control-Rapalog	+ Rapalog	Control-Rapalog	+ Rapalog
Parasitemia	%	0.42	0.48	1.96	2.02	4.23	3.68	13.11	3.84	23.16	3.98
young rings	%	3.4	12.9	87.4	70.5	13.5	33.3	60	0.9	25.7	8.8
late rings	%	13.8	19.4	2.3	4.2	23.4	30.2		14.9	22.9	9.9
young trophs	%	44.8	22.6		1.1	26.1	17.7	6.3	27.2	38.1	16.5
middle troph	%	38	38.7	2.3	3.2	36.9	5.2	10.5	38.2	10.5	30.8
late trophs	%		4.4	1.2	1.1			2.1	4.4		11
schizonts	%			6.8	9.5			19.9	1.7	1	1.1
pycnotic	%				9.5		13.6	3.2	12.3	1.9	22
Total parasites		29	31	87	94	111	96	95	114	105	91
		Control-Rapalog	+ Rapalog	Control-Rapalog	+ Rapalog	Control-Rapalog	+ Rapalog	Control-Rapalog	+ Rapalog	Control-Rapalog	+ Rapalog
Parasitemia	%	0.42	0.48	1.96	2.02	4.23	3.68	13.11	3.84	23.16	3.98
young rings	%	0.01428	0.06192	1.71304	1.4241	0.57105	1.22544	7.866	0.03456	5.95212	0.35024
late rings	%	0.05796	0.09312	0.04508	0.08484	0.98982	1.11136	0	0.57216	5.30364	0.39402
young trophs	%	0.18816	0.10848	0	0.02222	1.10403	0.65136	0.82593	1.04448	8.82396	0.6567
middle troph	%	0.1596	0.18576	0.04508	0.06464	1.56087	0.19136	1.37655	1.46688	2.4318	1.22584
late trophs	%	0	0.02112	0.02352	0.02222	0	0	0.27531	0.16896	0	0.4378
schizonts	%	0	0	0.13328	0.1919	0	0	2.60889	0.06528	0.2316	0.04378
pycnotic	%	0	0	0	0.1919	0	0.50048	0.41952	0.47232	0.44004	0.8756

## Sheet: Fig 2B 
Hours to trophozoite transition	Control	Rapalog			Unpaired t test
	13	20			P value	< 0,0001
	8	56			P value summary	****
	9	20			Significantly different? (P < 0.05)	Yes
	11	23			One- or two-tailed P value?	Two-tailed
	17	27			t, df	t=9,395 df=52
	15	25
	11	36			How big is the difference?
	8	36			Mean ± SEM of column A	12,30 ± 0,4798, n=27
	14	19			Mean ± SEM of column B	32,48 ± 2,094, n=27
	12	24			Difference between means	20,19 ± 2,148
	13	29			95% confidence interval	15,87 to 24,50
	11	24			R squared	0.6293
	15	36
	11	20			F test to compare variances
	14	40			F,DFn, Dfd	19,05, 26, 26
	12	45			P value	< 0,0001
	17	38			P value summary	****
	11	58			Significantly different? (P < 0.05)	Yes
	8	24				0.6293
	11	39
	12	48
	11	24
	15	28
	14	36
	12	26
	12	33
	15	43
Mean	12.2963	32.4815
SD	2.44669	10.6784

## Sheet: Fig 2C
Frecuency of event at ring stage	Ameboid shape Rapalog	Ameboid shape Control	Shape change Rapalog	Shape change Control	Position change KO	Position change control	Hugging Rapalog	Hugging control
	0	0.461539	0	0.6	0.304348	0.5	0.125	0.0833333
	0	0.375	0	0.571429	0	0.857143	1	0
	0	0.1	0	0.555556	0.897959	0.777778	0.38	0.1
	0.0833333	0	0.347826	0	0.478261	0	0.666667	0
	0	0.705882	0	1	0	0.4375	1	0.25
	0	0.0714286	0	0.230769	0.892857	0.384615	0.0344828	0
	0	0	0.0555556	0	0.277778	0.4	0.621622	0.0909091
	0.107143	0.714286	0.333333	1	0.481482	0.833333	0.0357143	0.142857
	0.1	0	0.1	0.0769231	0	0	1	0.285714
	0.027027	0.1	0.111111	0.363636	0	0.818182	0.594595	0
	0.136364	0.84	0.255814	0.84	0.813953	0.88	0.295455	0
	0.1	0.230769	0.631579	0.416667	0.631579	0.583333	0.1	0.153846
	0.236364	0.0909091	0.272727	0.4	0.327273	0.5	0.0357143	0.0909091
	0.444445	0.266667	0.31579	0.428571	0.263158	0.714286	0.3	0
	0	0	0.181818	0.1	0	0.4	0.956522	0
	0	0	0	0	0	0	0.814815	0.714286
	0.0526316	0	0.176471	0.181818	0	0.454545	0.31579	0
	0.0277778	0.176471	0.257143	0.5	0.342857	0.8125	0.861111	0
	0.08	0.75	0.244898	1	0.22449	0.818182	0.3	0
	0.0277778	0.285714	0.114286	0.857143	0.114286	0.571429	0.277778	0
	0.157895	0	0.5	0.1	0.333333	0.6	0.31579	0.0909091
	0.0892857	0.25	0.127273	0.454545	0.581818	0.363636	0.0892857	0.0833333
	0	0.48	0.2	0.583333	0	0.708333	1	0
	0	0.333333	0	0.434783	0	0.217391	0	0.166667
	0.0178571	0.375	0.0727273	0.565217	0.127273	0.826087	0.75	0.0416667
Table Analyzed
	ameoboid wt		shape change wt		moved position wt		hugging wt
	vs,		vs,		vs,		vs,
	ameoboid KO		shape change KO		moved position KO		hugging KO
Unpaired t test
P value	0.0011		0.0003		0.0029		< 0,0001
P value summary	**		***		**		****
Significantly different? (P < 0.05)	Yes		Yes		Yes		Yes
One- or two-tailed P value?	Two-tailed		Two-tailed		Two-tailed		Two-tailed
t, df	t=3,460 df=48		t=3,873 df=48		t=3,144 df=48		t=4,863 df=48
How big is the difference?
Mean ± SEM of column A	0,06752 ± 0,02005, n=25		0,1719 ± 0,03346, n=25		0,2837 ± 0,05925, n=25		0,4748 ± 0,07253, n=25
Mean ± SEM of column B	0,2643 ± 0,05322, n=25		0,4504 ± 0,06365, n=25		0,5383 ± 0,05521, n=25		0,09178 ± 0,03071, n=25
Difference between means	0,1968 ± 0,05687		0,2785 ± 0,07191		0,2546 ± 0,08099		-0,3830 ± 0,07877
95% confidence interval	0,08242 to 0,3111		0,1339 to 0,4231		0,09179 to 0,4175		-0,5414 to -0,2247
R squared	0.1996		0.2381		0.1708		0.33

## Sheet: Fig 2D 
Numer of Lyn-mCherry protrusions	Control	Rapalog		Unpaired t test
	0	2		P value	0.0003
	0	1		P value summary	***
	0	1		Significantly different? (P < 0.05)	Yes
	0	0		One- or two-tailed P value?	Two-tailed
	0	0		t, df	t=3,883 df=51
	1	3
	0	2		How big is the difference?
	0	0		Mean ± SEM of column A	0,0800 ± 0,05538, n=25
	1	0		Mean ± SEM of column B	1,036 ± 0,2270, n=28
	0	1		Difference between means	0,9557 ± 0,2461
	0	2		95% confidence interval	0,4616 to 1,450
	0	0		R squared	0.2282
	0	0
	0	3		F test to compare variances
	0	1		F,DFn, Dfd	18,82, 27, 24
	0	1		P value	< 0,0001
	0	1		P value summary	****
	0	0		Significantly different? (P < 0.05)	Yes
	0	0
	0	0
	0	1
	0	1
	0	0
	0	1
	0	1
		0
		5
		2

## Sheet: Fig 2E 
Number of Bodipy positive protrusions	Control	Rapalog		Unpaired t test
	1	1		P value	0.0003
	1	1		P value summary	***
	1	1		Significantly different? (P < 0.05)	Yes
	1	2		One- or two-tailed P value?	Two-tailed
	0	1		t, df	t=3,690 df=227
	0	2
	0	2		How big is the difference?
	1	3		Mean ± SEM of column A	0,8904 ± 0,07184, n=73
	1	2		Mean ± SEM of column B	1,301 ± 0,06831, n=156
	1	0		Difference between means	0,4109 ± 0,1113
	2	2		95% confidence interval	0,1915 to 0,6303
	0	1		R squared	0.05659
	1	4
	1	1		F test to compare variances
	1	1		F,DFn, Dfd	1,933, 155, 72
	0	0		P value	0.002
	1	1		P value summary	**
	1	1		Significantly different? (P < 0.05)	Yes
	1	2
	2	1
	0	0
	2	2
	1	2
	1	0
	1	2
	1	1
	1	1
	1	1
	1	1
	1	1
	0	2
	1	1
	1	3
	2	1
	1	1
	1	2
	1	2
	1	1
	1	1
	0	1
	0	3
	2	1
	1	1
	1	1
	1	1
	1	2
	2	2
	2	1
	0	2
	1	1
	1	1
	2	1
	1	2
	1	1
	1	2
	1	0
	0	2
	1	2
	1	1
	0	2
	1	2
	2	2
	0	0
	1	1
	0	0
	1	1
	1	1
	1	2
	0	0
	0	3
	0	1
	0	2
	2	0
		0
		0
		3
		1
		2
		2
		1
		0
		1
		0
		1
		2
		1
		1
		3
		0
		2
		2
		2
		1
		0
		2
		2
		0
		1
		2
		2
		1
		1
		1
		2
		1
		0
		0
		1
		3
		1
		1
		1
		1
		2
		1
		1
		0
		2
		0
		2
		0
		1
		1
		1
		1
		3
		1
		0
		1
		2
		2
		1
		3
		2
		1
		2
		2
		2
		4
		2
		1
		0
		1
		1
		1
		1
		1
		2
		2
		0
		0
		1
		1
		1
		1
		2

## Sheet: Fig 2G 
% of positive cells	Control Pfs16	Rapalog Pfs16	Control Pg377	Rapalog Pg377
	3.2	2.3	1.96	0.62
	2.7	2.1	1.22	0.72
	2.8	1.9	0.24	0.11
Ratio	Control Pfs16	Rapalog Pfs16	Control Pg377	Rapalog Pg377
% positive cells in rapalog vs control	1	0.71875	1	0.316326
	1	0.77778	1	0.590164
	1	0.67857	1	0.458333
Table Analyzed	% Gametocytes	% Gametocytes	% Gametocytes	Ratio
	Rapalog Pfs16	Rapalog Pg377	Rapalog Pg377	Rapalog Pg377
	vs,	vs,	vs,	vs,
	Control Pfs16	Control Pg377	Rapalog Pfs16	Rapalog Pfs16
Unpaired t test
P value	0.0139	0.2852	0.0019	0.0326
P value summary	*	ns	**	*
Significantly different? (P < 0.05)	Yes	No	Yes	Yes
One- or two-tailed P value?	Two-tailed	Two-tailed	Two-tailed	Two-tailed
t, df	t=4,178 df=4	t=1,233 df=4	t=7,303 df=4	t=3,209 df=4
How big is the difference?
Mean ± SEM of column A	2,900 ± 0,1528, n=3	1,140 ± 0,4981, n=3	2,100 ± 0,1155, n=3	0,7250 ± 0,02881, n=3
Mean ± SEM of column B	2,100 ± 0,1155, n=3	0,4833 ± 0,1889, n=3	0,4833 ± 0,1889, n=3	0,4549 ± 0,07907, n=3
Difference between means	-0,8000 ± 0,1915	-0,6567 ± 0,5327	-1,617 ± 0,2214	-0,2701 ± 0,08415
95% confidence interval	-1,332 to -0,2684	-2,136 to 0,8225	-2,231 to -1,002	-0,5037 to -0,03644
R squared	0.8136	0.2753	0.9302	0.7203

## Sheet: Fig 3B 
Relative activity of complementation constructs vs EXP1 wt NMDE3
	ΔEXP1 (basal, 0%)	0.87	-1.73	5.72	-3.46	-2.12	0.71
	EXP1 wt NMDE3 (100%)	102.48	66.38	89.25	107.73	114.43	119.69	113.52
	EXP1 wt HSP86	127.81	123.58	99.62	105.15	113.73
	EXP1 wt SFA32	71.45	52.75	40.02	10.88	7.14	22	4.96
	EXP! TM mut	17.7	21.82	8.36	16.42	-1.14
	EXP1 ΔED	42.02	34.99	31.33	25.42
	Exp1 ΔC 105-162	61.57	46.35	42.28	60.09	80.64	65.29
	Pb EXP1 Ty1	36.01	37.3	57.6	52.75	46.89

## Sheet: Fig 3D 
Densitometric analyses	low	mid	high
Normalized fluorescence: Ty1 fluorescence/ BIP fluorescence	0.133305	1	0.995564
Ratio of normalized fluorescence vs normalized fluorescence of mid	0.0867521	1	1.27645
	0.565802	1	1.39125
Number of values	3	3	3
Minimum	0.08675	1	0.9956
25% Percentile	0.08675	1	0.9956
Median	0.1333	1	1.276
75% Percentile	0.5658	1	1.391
Maximum	0.5658	1	1.391
Mean	0.262	1	1.221
Std. Deviation	0.2642	0	0.2036
Std. Error of Mean	0.1525	0	0.1175
Lower 95% CI of mean	-0.3943	1	0.7154
Upper 95% CI of mean	0.9182	1	1.727
Sum	0.7859	3	3.663

[truncated: 18 more sheets: Fig 4B, Fig 4D , Fig 4E, Fig 4F, Fig 4G, Fig 4H, Fig 4I, Fig 5A, Fig 5B, Fig 5D right, Fig 5D left, Fig 6B , Fig 6E , Fig 6J, Fig 7B, Fig 7C, Fig 7d, Fig 7E]
